# Supplementary material for: Bio-inspired branched Au–Cu nanoalloys for achieving synergistic dual-pathway peroxidase-like activity
Source: Royal Society of Chemistry journal article supplement (doi:10.1039/d6ra00153j), 2026-04-24
Supplement: d6ra00153j1.pdf [file d6ra00153j1.pdf]

## Supporting Information

### Bio-Inspired Branched Au–Cu Nanoalloys as Synergistic Dual-Pathway Peroxidase like activity

*S. Priya*<sup>\*a</sup>, *S. Sruthi*<sup>b</sup>, *P. Aiswarya*<sup>c</sup> and *R. Manu*<sup>c</sup>

*a-NSS college Ottapalam, b-NSS College Nemmara, c-SVNSS college*

Keywords-Au-Cu Nanoalloy, Coreduction, Green synthesis, Peroxidase mimicking, Multimodal sensing

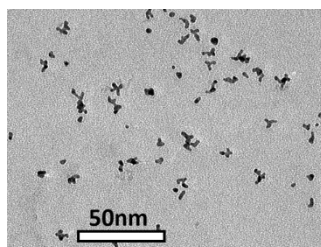

**Fig S1a-TEM image after 1 year**

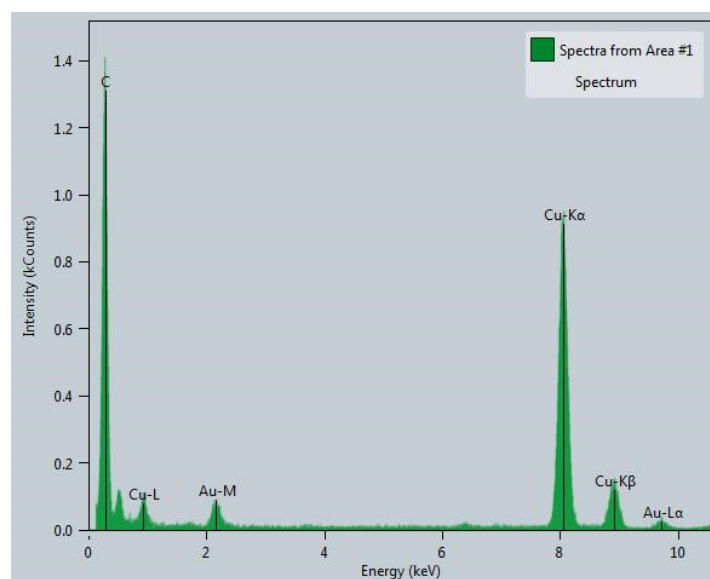

**Fig S2 -HAADF EDS spectrum**

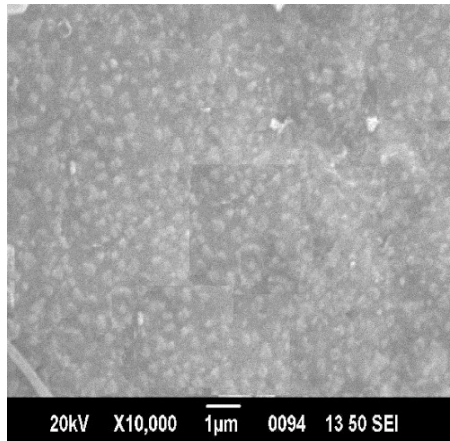

**Figure S3-SEM image of Au-Cu NA**

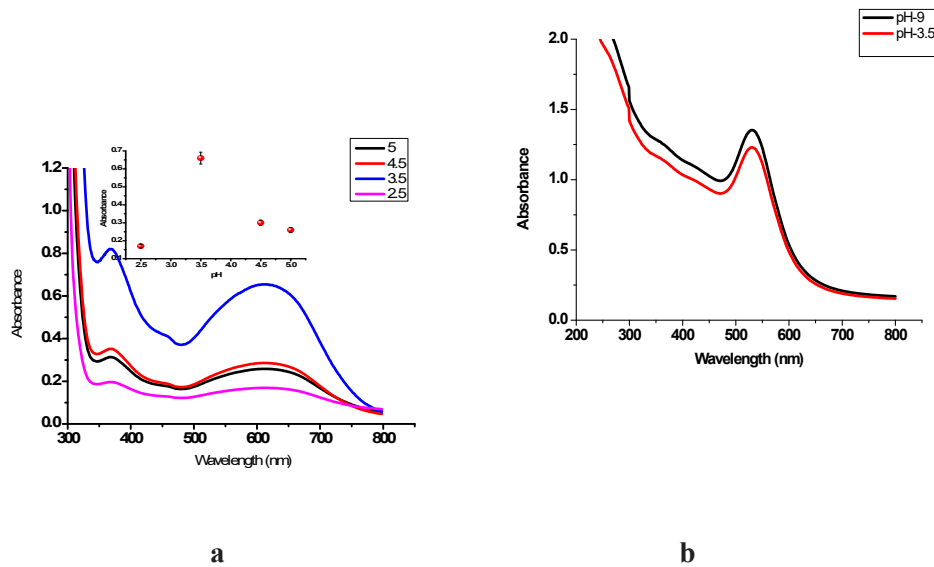

**Fig S4 a- Plot of Absorbance for various pH conditions. Inset show the plot of abs vs pH b- UV-Vis spectrum of Au-Cu NA at pH 9 and 3.**

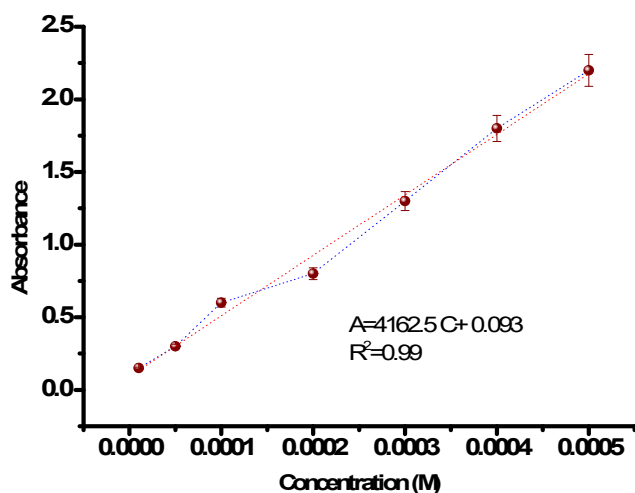

Fig S5- Plot of Abs vs Conc for various concentration of H<sub>2</sub>O<sub>2</sub> from 10 $\mu$ M to 500 $\mu$ M

#### Radical scavenging assay

The hydrogen peroxide (H<sub>2</sub>O<sub>2</sub>) scavenging activity of the samples was evaluated according to the method described by Ruch et al. A 40 mM solution of H<sub>2</sub>O<sub>2</sub> was prepared in phosphate buffer and mixed with the test samples. The remaining concentration of H<sub>2</sub>O<sub>2</sub> was measured spectrophotometrically by recording the absorbance at 230 nm. The percentage of H<sub>2</sub>O<sub>2</sub> scavenging activity was then calculated accordingly. A<sub>0</sub> represents the absorbance of the control sample, while A<sub>1</sub> denotes the absorbance after treatment with ascorbic acid, Cur-GNP and Au-Cu NA.

The figures below illustrate the radical scavenging activity of ascorbic acid, and Au-Cu NA. A progressive decrease in absorbance at 230 nm was observed with increasing concentrations of ascorbic acid and Au-CuNA, indicating enhanced H<sub>2</sub>O<sub>2</sub> scavenging activity. Scavenging efficiency is found to be higher for Au-Cu NA. This shows that Au-Cu NA has good catalytic efficiency to rupture O-O bond of H<sub>2</sub>O<sub>2</sub>.

$$\frac{A_0 - A_1}{A_0} \times 100$$

(Reference-Keser, Serhat & Celik, Sait & Türkoğlu, Semra & Yilmaz, Okkes & Turkoglu, Ismail. (2012). Hydrogen Peroxide Radical Scavenging and Total Antioxidant Activity of Hawthorn. Chem J. 2.)

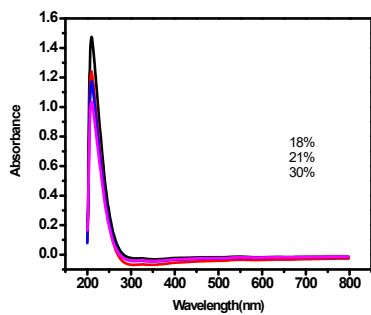

a

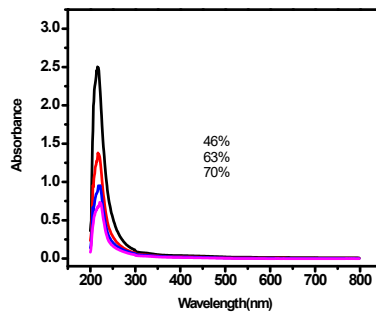

b

Fig S6-Radical scavenging efficiency of a- ascorbic acid b-Au-Cu NA

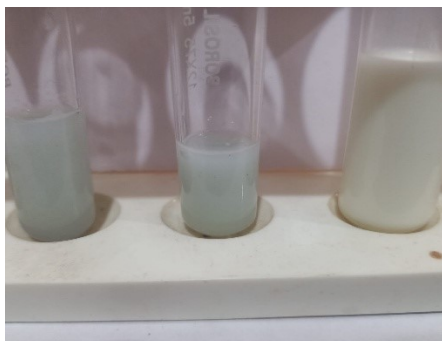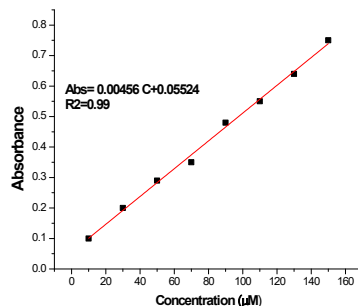

|   | Concentration Spiked | Recovered concentration | Recovery % |
|---|----------------------|-------------------------|------------|
| 1 | 90µM                 | 87 µM                   | 96%        |
| 2 | 130 µM               | 125 µM                  | 95%        |

**Figure-S7 Real sample analysis and colour change observed for various concentrations of  $H_2O_2$**

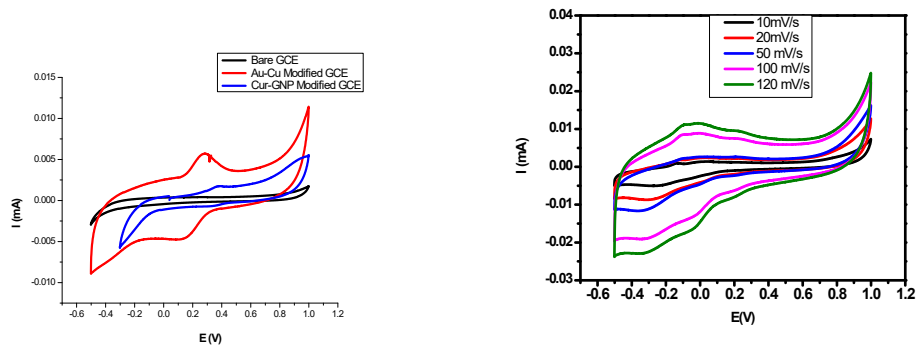

**Fig S8 a- Cyclic voltametric response of GCE, Au-Cu nano particle and Gold nanoparticle modified electrode vs SCE. b-Scan rate variation.**

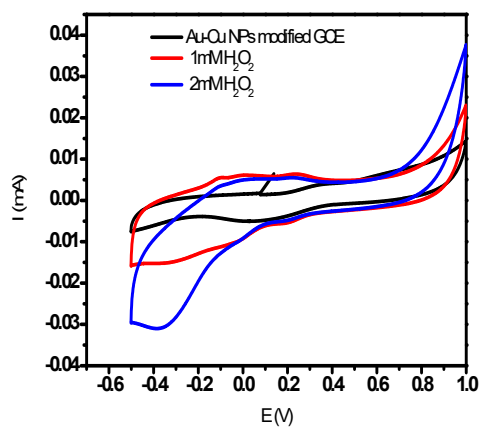

**Fig S9- Cyclic voltametric response of Au-Cu modified electrode in various concentration of  $H_2O_2$ .**

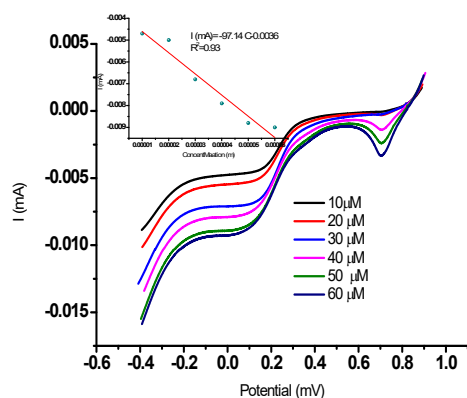

**FigS10- Calibration plot for the concentration range from 10-60  $\mu\text{M}$ .**

**Table S1-Showing comparison of detection limits of various gold based nanozymes**

| SI No. | Type                                                    | Detection limit    | Reference |
|--------|---------------------------------------------------------|--------------------|-----------|
| 1      | Gold nano rattles                                       | 0.5 $\mu\text{M}$  | 1         |
| 2      | Graphene-oxide gold                                     | 1.9 nM             | 2         |
| 3      | Au@PtNP/GO                                              | 1.6 $\mu\text{M}$  | 3         |
| 4      | Fe <sub>3</sub> O <sub>4</sub> @PB@Au                   | 13.4 $\mu\text{M}$ | 4         |
| 5      | Au@CMs                                                  | 7 $\mu\text{M}$    | 5         |
| 6      | Cu doped carbonized bacterial cellulose (BC) nanofibers | 2.2 $\mu\text{M}$  | 6         |
| 7      | gold nanoparticles deposited CeO <sub>2</sub>           | 3 $\mu\text{M}$    | 7         |

## References

1. S. Ghosh, P. Singh, S. Roy, K. Bhardwaj and A. Jaiswal, ChemBioChem, 2022, 23,
2. G. H. Jin, E. Ko, M. K. Kim, V.-K. Tran, S. E. Son, Y. Geng, W. Hur and G. H. Seong, Sens. Actuators B Chem., 2018, 274, 201–209
3. E. Ko, V. K. Tran, S. E. Son, W. Hur, H. Choi and G. H. Seong, Sens. Actuators B Chem., 2019, 294, 166–176.
4. S. Ruan, S. Chen, Y. Tu, Y. Liu, R. You, Q. Lin and Y. Lu, Microchem. J., 2024, 205, 111377.
5. Y. Wei, J. Lu, Y. Xu, X. Song, Y. Yu, H. Zhang and X. Luo, Microchem. J., 2023, 193, 109113.
6. S. Zhang, F. Ding, S. Huang and X. Ren, Chem. Eng. J., 2025, 507, 160602.
7. N. Jabiyeva, B. Çakıroğlu and A. Özdemir, J. Photochem. Photobiol. A Chem., 2024, 452, 115576.
